# Supplementary material for: A novel architecture based upon multi-walled carbon nanotubes and ionic liquid to improve the electroanalytical detection of ciprofibrate
Source: Royal Society of Chemistry journal article supplement (doi:10.1039/c4an00861h), 2014-05-15
Supplement: c4an00861h1.pdf [file c4an00861h1.pdf]

## Electronic Supplementary Information for the Paper

**A novel architecture based upon multi-walled carbon nanotubes and ionic liquid to  
improve the electroanalytical detection of ciprofibrate**

Fernando Campanhã Vicentini<sup>a</sup>, Amanda Elisa Ravanini<sup>a</sup>, Tiago Almeida Silva<sup>a</sup>,  
Bruno C. Janegitz<sup>b</sup>, Valtencir Zucolotto<sup>b</sup> and Orlando Fatibello-Filho<sup>a\*</sup>

<sup>a</sup>Department of Chemistry, Federal University of São Carlos, Rod. Washington Luís km  
235, P. O. Box 676 São Carlos, 13560-970, SP, Brazil

<sup>b</sup>Nanomedicine and Nanotoxicology Group, Physics Institute of São Carlos, University  
of São Paulo, 13566-390 São Carlos, SP, Brazil

\*Corresponding author

Tel.: +55 16 33518098; Fax: +55 16 33518350

E-mail address: bello@ufscar.br (O. Fatibello-Filho)

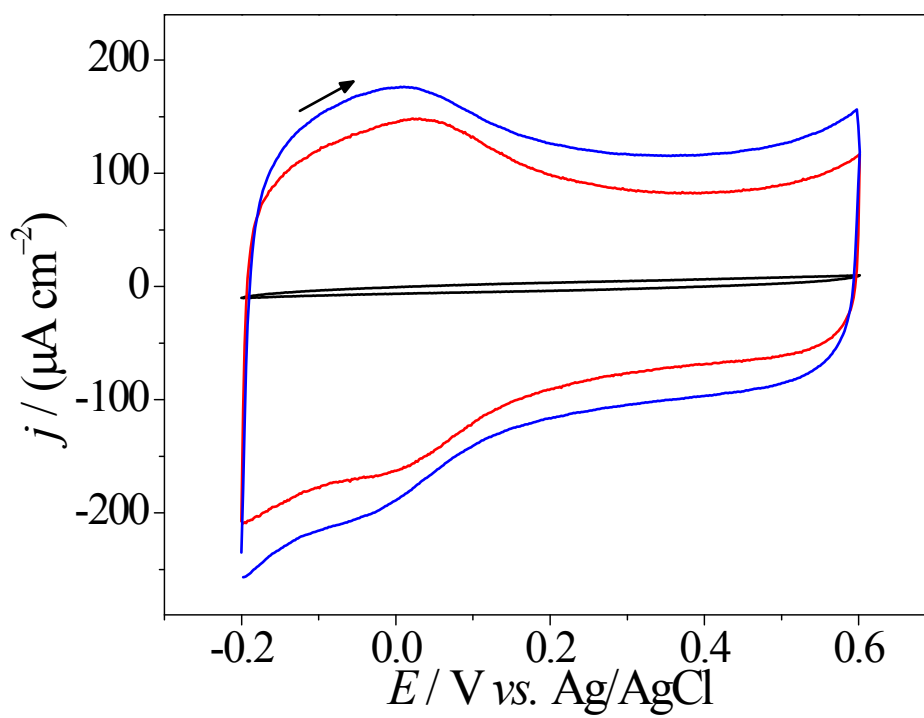

**Figure S1.** Cyclic voltammograms obtained in 0.1 mol L<sup>-1</sup> KCl solution using: GCE (—), MWCNTs-CTS/GCE (—) and IL-MWCNTs-CTS/GCE (—).  $\nu = 50 \text{ mV s}^{-1}$ .

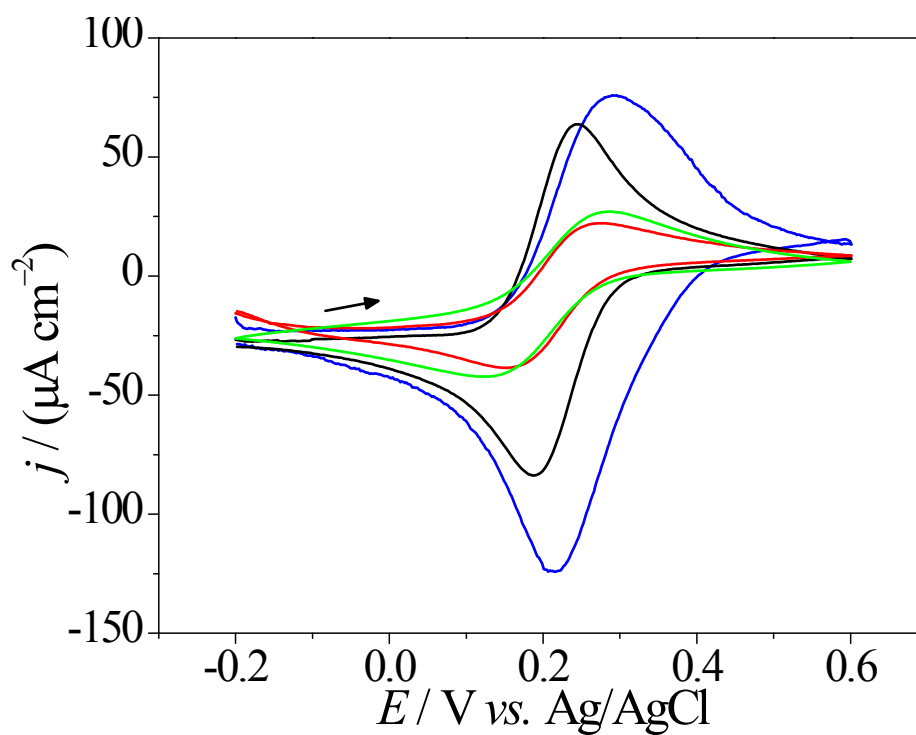

**Figure S2.** Cyclic voltammograms obtained for  $1.0 \times 10^{-3} \text{ mol L}^{-1} \text{ K}_4\text{Fe}(\text{CN})_6$  in  $0.1 \text{ mol L}^{-1} \text{ KCl}$  solution using GCE (—), IL-MWCNTs-DHP/GCE (—), IL-MWCNTs-Nafion/GCE (—), and IL-MWCNTs-CTS/GCE (—).  $\nu = 10 \text{ mV s}^{-1}$ .

**Table S1**

$\Delta E_p$ ,  $j_a$ , and  $j_c$  values obtained from the CV recorded at  $10 \text{ mV s}^{-1}$  for the probe  $[\text{Fe}(\text{CN})_6]^{4-/3-}$  using GCE, IL-MWCNTs-DHP/GCE, IL-MWCNTs-Nafion/GCE and IL-MWCNTs-CTS/GCE

| Electrode            | $\Delta E_p$ (mV) | $j_a$ ( $\mu\text{Acm}^{-2}$ ) | $j_c$ ( $\mu\text{Acm}^{-2}$ ) | $A^*$ ( $\text{cm}^2$ ) |
|----------------------|-------------------|--------------------------------|--------------------------------|-------------------------|
| GCE                  | 164.8             | 27.0                           | -42.2                          | 0.026                   |
| IL-MWCNTs-DHP/GCE    | 55.5              | 63.4                           | -83.1                          | 0.076                   |
| IL-MWCNTs-Nafion/GCE | 105.1             | 21.1                           | -38.0                          | 0.020                   |
| IL-MWCNTs-CTS/GCE    | 79.3              | 74.6                           | -122.5                         | 0.088                   |

\*Electroactive area
